# Supplementary material for: Development of a prognostic model based on an immunogenomic landscape analysis of medulloblastoma
Source: Oxford University Press journal article supplement (doi:10.1042/bsr20202907), 2020-12-21
Supplement: bsr-2020-2907_supp.pdf [file bsr-2020-2907_supp.pdf]

Fig. S1

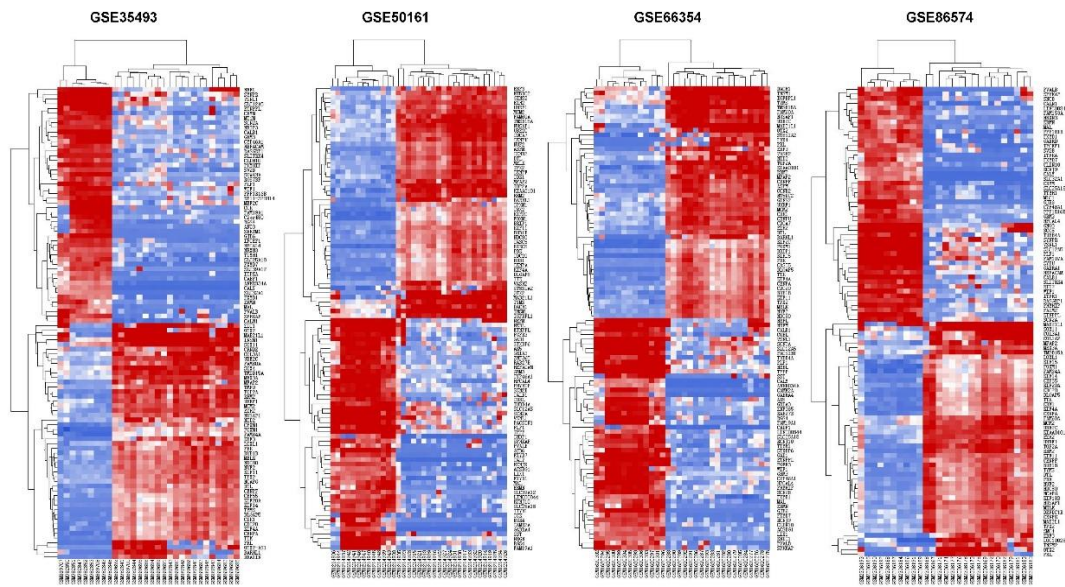

**Fig.S1**

Heatmaps of top DEGs (25 up- and down-regulated) in each dataset (GSE35493, GSE50161, GSE66354 and GSE86574).

**Fig. S2**

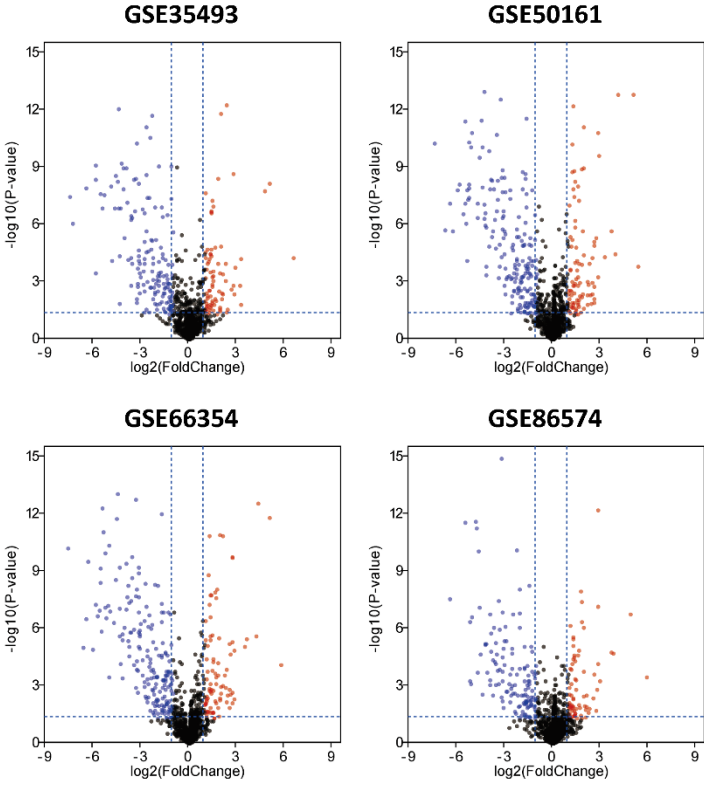

**Fig.S2**

Volcanoplots of differentially expressed IRGs (Red for Up-regulated and blue for down-regulated).

Fig. S3

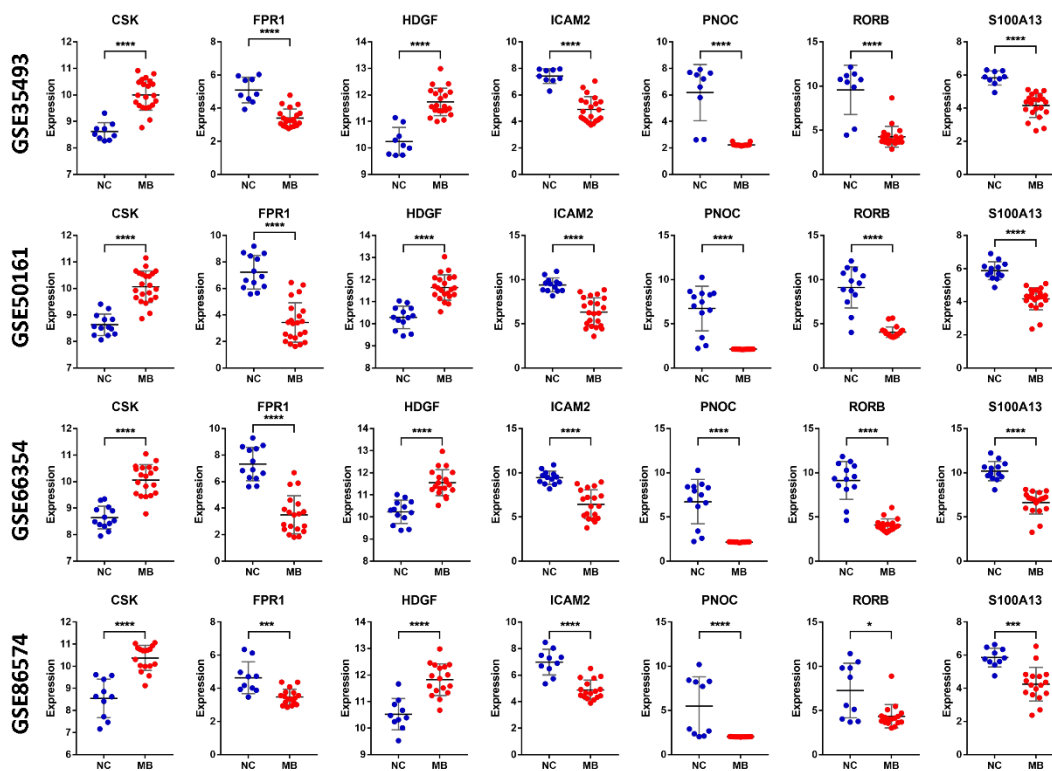

Fig.S3

Expression of seven core genes in the four training datasets.

**Fig.S4**

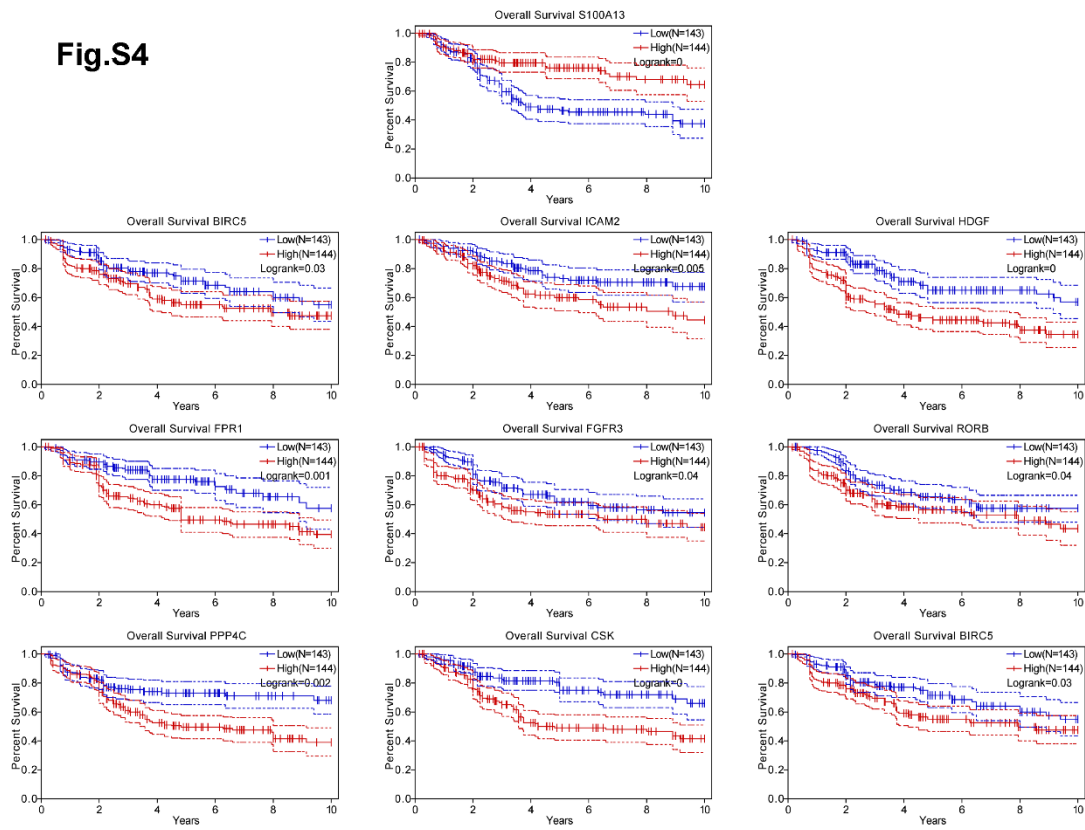

**Fig.S4**  
Survival plots of ten core genes.

Fig. S5

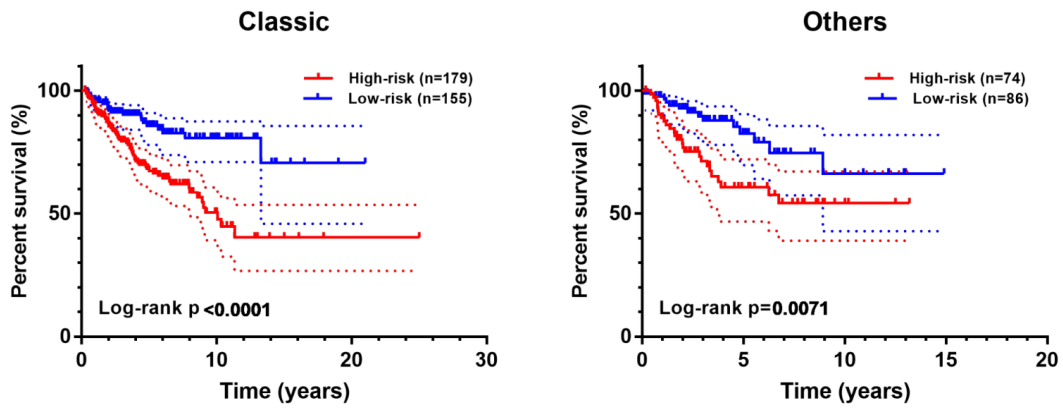

**Fig.S5**

Survival analysis of the model in Classic MBs and the others.

**Table. S1**

The information of the core genes.

| <b>Gene</b>    | <b>Molecular Function</b>                                                                                                                                                                                  | <b>Subcellular Location</b>                               |
|----------------|------------------------------------------------------------------------------------------------------------------------------------------------------------------------------------------------------------|-----------------------------------------------------------|
| <b>HDGF</b>    | Acts as a transcriptional repressor and has mitogenic activity for fibroblasts.                                                                                                                            | Nucleus                                                   |
| <b>CSK</b>     | Non-receptor tyrosine-protein kinase that plays an important role in the regulation of cell growth, differentiation, migration, and immune response.                                                       | Plasma membrane                                           |
| <b>PNOC</b>    | Ligand of the opioid receptor-like receptor OPRL1. It may act as a transmitter in the brain by modulating nociceptive and locomotor behavior. May be involved in neuronal differentiation and development. | Extracellular                                             |
| <b>S100A13</b> | It plays a role in the export of proteins that lack a signal peptide and are secreted by an alternative pathway.                                                                                           | Plasma membrane,<br>Extracellular,<br>Nucleus,<br>Cytosol |
| <b>RORB</b>    | The nuclear receptor binds DNA as a monomer to ROR response elements (RORE) containing a single core motif half-site 5'-AGGTCA-3' preceded by a short A-T-rich sequence.                                   | Nucleus                                                   |
| <b>FPR1</b>    | High affinity receptor for N-formyl-methionyl peptides (fMLP), which are powerful neutrophil chemotactic factors.                                                                                          | Lysosome                                                  |
| <b>ICAM2</b>   | Ligands for the leukocyte adhesion protein LFA-1 (integrin alpha-L/beta-2). ICAM2 may play a role in lymphocyte recirculation by blocking LFA-1-dependent cell adhesion.                                   | Plasma membrane                                           |
